# Supplementary material for: The genomic signature of trait-associated variants
Source: PubMed Central journal article supplement (PMC3600003; doi:10.1186/1471-2164-14-108), 2013-02-18

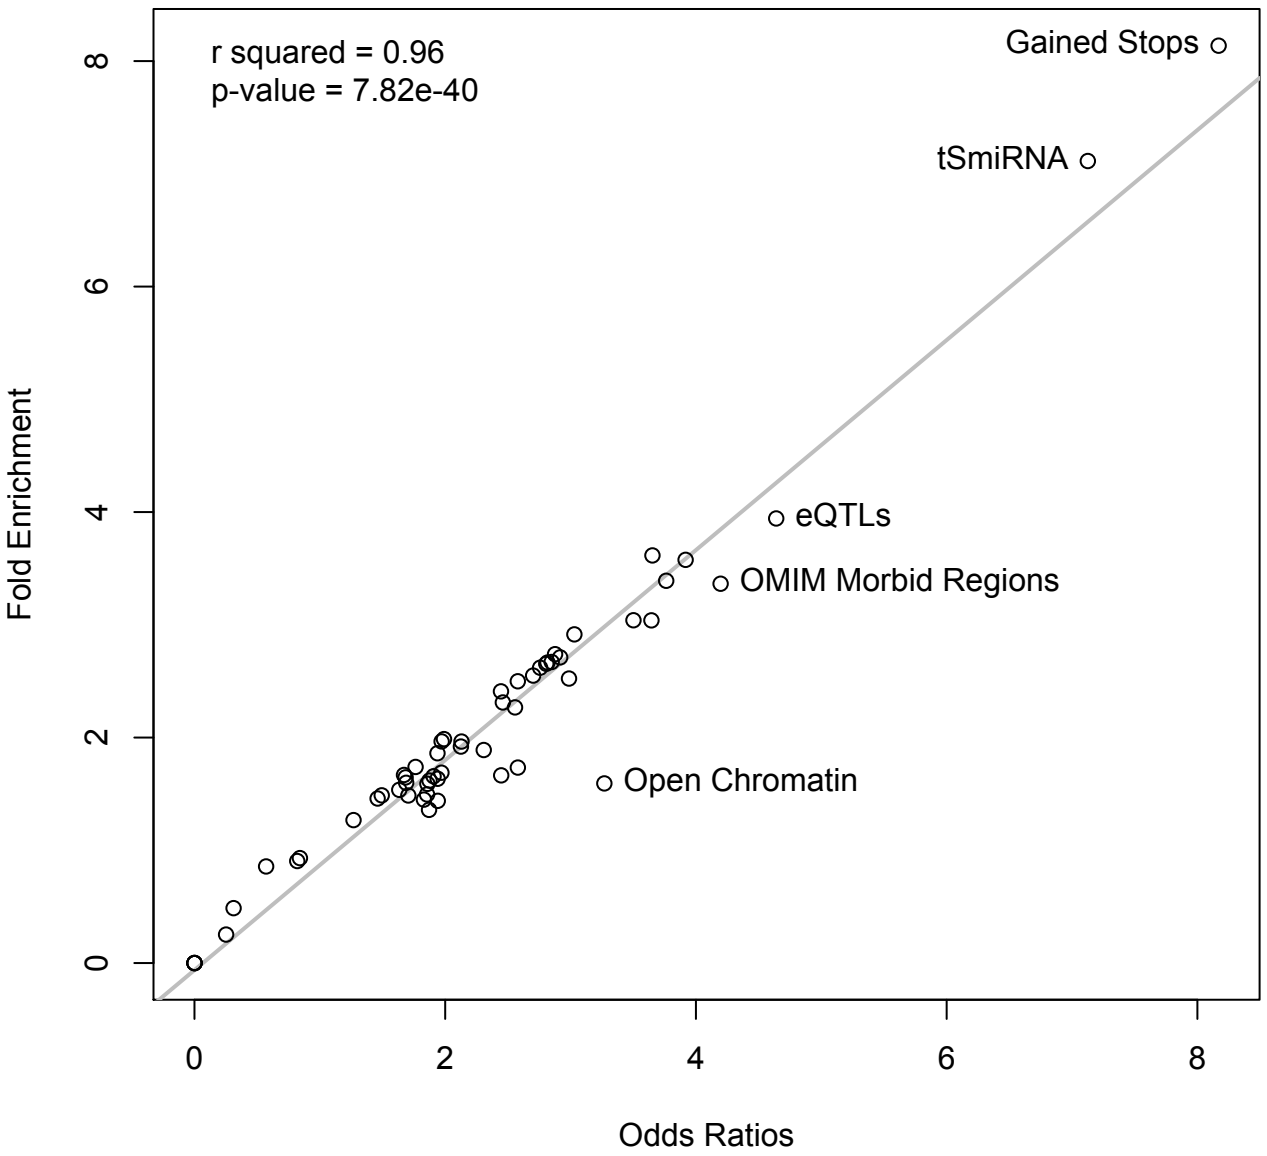

Supplement: 1471-2164-14-108-S3.pdf [file 1471-2164-14-108-S3.pdf]
