# Supplementary material for: The genomic signature of trait-associated variants
Source: PubMed Central journal article supplement (PMC3600003; doi:10.1186/1471-2164-14-108), 2013-02-18
Supplement: 1471-2164-14-108-S5.pdf [file 1471-2164-14-108-S5.pdf]

Odds Ratios - Log Scale

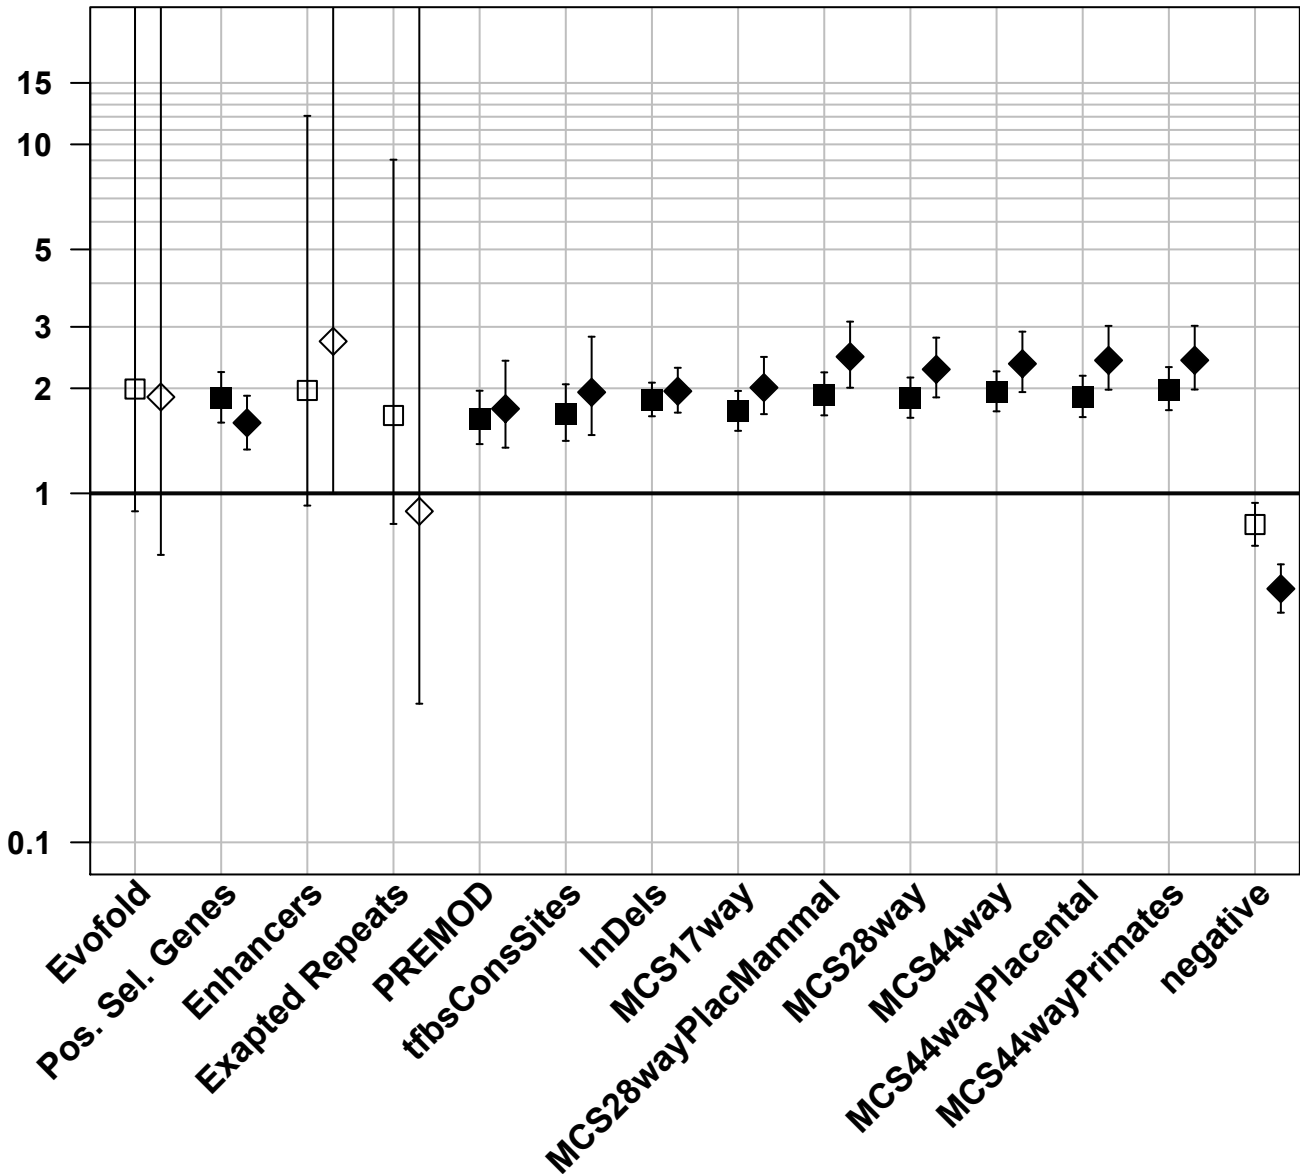

□  $r^2 > 0.9$

◇  $r^2 > 0.7$

| 95% CI

• Significant
